# Supplementary material for: The effect of valproic acid on SLC5A8 expression in gonad-intact and gonadectomized rat thymocytes
Source: PubMed Central journal article supplement — Int J Immunopathol Pharmacol. 2022 Feb 4;36:20587384211051954. doi: 10.1177/20587384211051954 (PMC8819739; doi:10.1177/20587384211051954), 2022-02-04

**Title**

**Figure 1.** *Slc5a8* (A) and *Slc12a2* (B) genes expression in thymocytes of both gender gonad-intact and gonadectomized rats. The relative gene expression in VPA-treated as compared with their control groups. White color represents female rats, black – male rats; thick black line shows the starting point of gene expression; \* $p < 0.05$ .

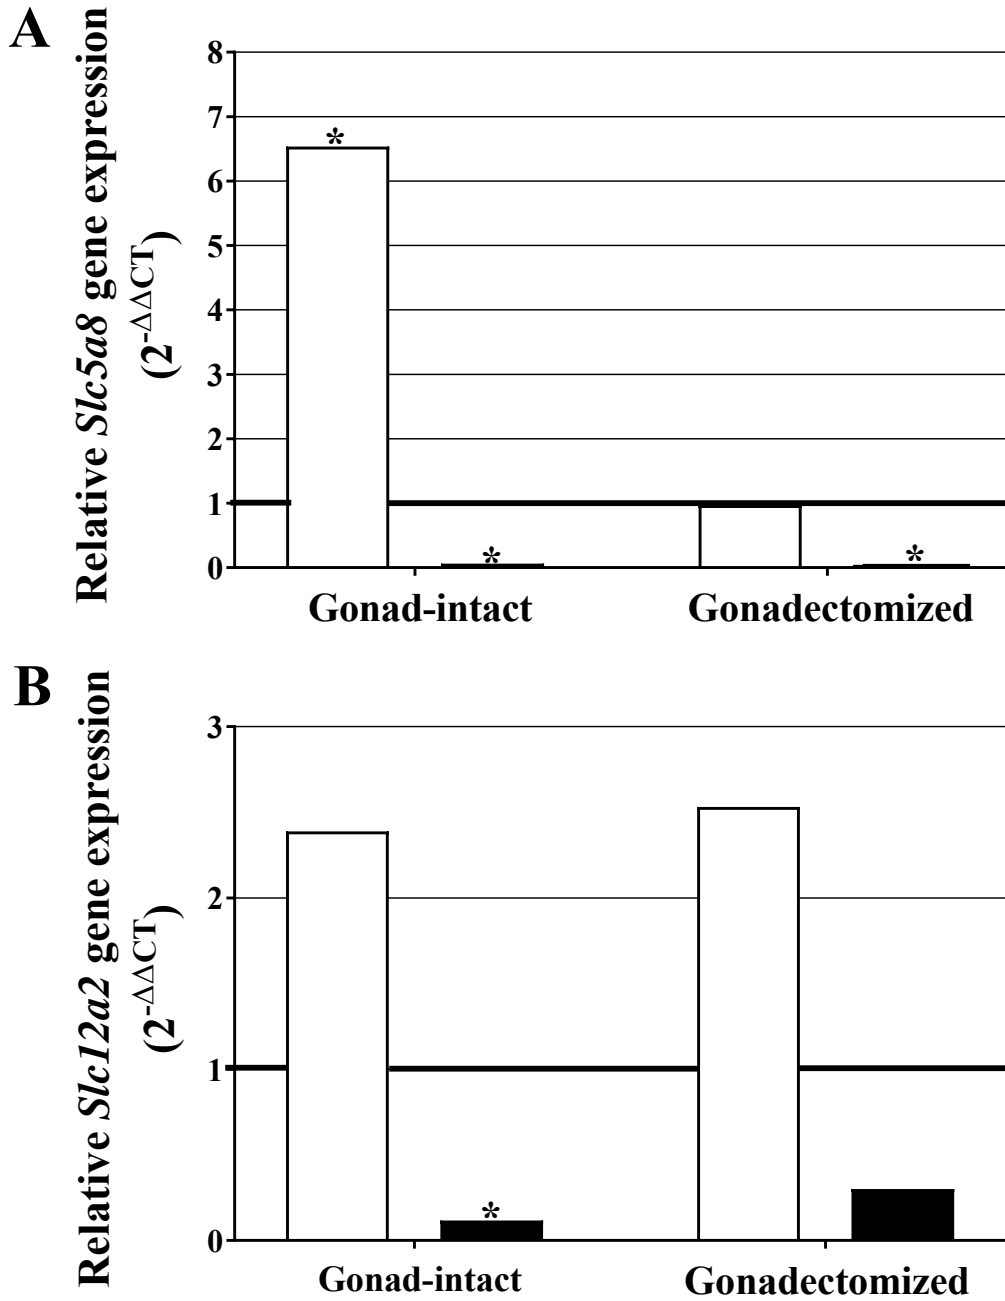

Supplement: sj-pdf-1-iji-10.1177_20587384211051954.pdf [file sj-pdf-1-iji-10.1177_20587384211051954.pdf]
